# Supplementary material for: Flow Balancing with Uncertain Demand for Automated Package Sorting Centers
Source: Atypon-hosted journal article supplement (doi:10.1287/trsc.2015.0662), 2016-05-10
Supplement: trsc.2015.0662-sm.pdf [file trsc.2015.0662-sm.pdf]

---

## Appendix A

### Binary Search Algorithm

---

#### Initialization:

Let

$\epsilon = 10^{-3}$  // Small constant

$\delta = 10^{-3}$  // Target absolute difference between the calculated upper and lower bounds for  $Z$

$L \leftarrow 0, U \leftarrow 1 + \delta + \epsilon$  // Initialization of lower and upper bounds for  $Z$

$Z^0 \leftarrow 1$  // Initialization of the  $Z$  imbalance measure

$T = 10800$  // Time limit (in seconds) for searching for a feasible solution for a given  $Z^0$

$t$  // Time spent in attempting to find a feasible solution given bound  $Z^0$  (if it exists)

**while**  $(U - Z^0) > \delta$  **do**

    Solve model with  $Z$  fixed at the value  $Z^0$ ,

**if** *feasible integer solution is found* **then**

$U \leftarrow Z^0$ ,

**end**

**else if**  $t > T$  or *Infeasibility is proven* **then**

$L \leftarrow Z^0$ ,

**end**

$Z^0 \leftarrow \frac{U+L}{2} + L$

**end**

---

---

## Appendix B

As defined in Section 5,  $d_{is}$  denotes the nominal number of doors required by destination  $i$  during sort  $s$  and is calculated as the median of the random variable  $\tilde{d}_{is}$ , representing the number of doors required by destination  $i$  during sort  $s$ .

---

### FBP1-D

$$\text{minimize } Z \quad (\text{FBP1-D-1})$$

$$\text{s.t. } \sum_{j \in I} x_{ij} = 1, \quad \text{for all } i \in I, \quad (\text{FBP1-D-2})$$

$$\frac{\sum_{i \in I} \mu_{is} x_{ij}}{\sum_{i \in I} \mu_{is}} - P_{js} \leq Z, \quad \text{for all } j \in J, s \in S, \quad (\text{FBP1-D-3})$$

$$P_{js} - \frac{\sum_{i \in I} \mu_{is} x_{ij}}{\sum_{i \in I} \mu_{is}} \leq Z, \quad \text{for all } j \in J, s \in S, \quad (\text{FBP1-D-4})$$

$$\sum_{i \in I} d_{is} x_{ij} \leq D_j, \quad \text{for all } j \in J, s \in S, \quad (\text{FBP1-D-5})$$

$$SC, \quad (\text{FBP1-D-6})$$

$$x_{ij} \in \{0, 1\}, \quad \text{for all } i \in I, j \in J. \quad (\text{FBP1-D-7})$$


---

### FBP1-B

$$\text{minimize } Z \quad (\text{FBP1-B-1})$$

$$\text{s.t. } \sum_{j \in I} x_{ij} = 1, \quad \text{for all } i \in I, \quad (\text{FBP1-B-2})$$

$$F^{-1} \left( \frac{q+1}{2} \right)^2 (\boldsymbol{\tau}_{js}^\top \boldsymbol{\tau}_{js}) \leq \zeta_{js}^2, \quad \text{for all } j \in J, s \in S, \quad (\text{FBP1-B-3})$$

$$F^{-1} \left( \frac{1-q}{2} \right)^2 (\boldsymbol{\tau}_{js}^\top \boldsymbol{\tau}_{js}) \leq \phi_{js}^2, \quad \text{for all } j \in J, s \in S, \quad (\text{FBP1-B-4})$$

$$\boldsymbol{\tau}_{js} = \mathbf{L}_s^\top \mathbf{y}_{js}, \quad \text{for all } j \in J, s \in S, \quad (\text{FBP1-B-5})$$

$$\zeta_{js} = (Z - \boldsymbol{\mu}_s^\top \mathbf{y}_{js}), \quad \text{for all } j \in J, s \in S, \quad (\text{FBP1-B-6})$$

$$\phi_{js} = (Z + \boldsymbol{\mu}_s^\top \mathbf{y}_{js}), \quad \text{for all } j \in J, s \in S, \quad (\text{FBP1-B-7})$$

$$\sum_{i \in I} d_{is} x_{ij} \leq D_j, \quad \text{for all } j \in J, s \in S, \quad (\text{FBP1-B-8})$$

$$SC, \quad (\text{FBP1-B-9})$$

$$\zeta_{js}, \phi_{js} \geq 0, \quad \text{for all } j \in J, s \in S, \quad (\text{FBP1-B-10})$$

$$x_{ij} \in \{0, 1\}, \quad \text{for all } i \in I, j \in J. \quad (\text{FBP1-B-11})$$


---

---

**FBP1-R**

$$\text{minimize } Z \quad (\text{FBP1-R-1})$$

$$\text{s.t. } \sum_{j \in I} x_{ij} = 1, \quad \text{for all } i \in I, \quad (\text{FBP1-R-2})$$

$$\frac{\sum_{i \in I} \mu_{is} x_{ij}}{\sum_{i \in I} \mu_{is}} - P_{js} \leq Z, \quad \text{for all } j \in J, s \in S, \quad (\text{FBP1-R-3})$$

$$P_{js} - \frac{\sum_{i \in I} \mu_{is} x_{ij}}{\sum_{i \in I} \mu_{is}} \leq Z, \quad \text{for all } j \in J, s \in S, \quad (\text{FBP1-R-4})$$

$$\sum_{i \in I} d_{is} x_{ij} + \sum_{i \in \hat{I}_s} \pi_{ijs} + V_{js} \leq D_j, \quad \text{for all } j \in J, s \in S, \quad (\text{FBP1-R-5})$$

$$\eta_{js} \geq \rho \left( \sum_{i \in \hat{I}_s} x_{ij} \right), \quad \text{for all } j \in J, s \in S, \quad (\text{FBP1-R-6})$$

$$\lambda_{js} + \pi_{ijs} \geq \hat{d}_{is} x_{ij}, \quad \text{for all } i \in \hat{I}_s, j \in J, s \in S, \quad (\text{FBP1-R-7})$$

$$V_{js} \geq t \lambda_{js} + \left( \sum_{k=t}^{T_{js}} \kappa_{js}^k - 1 \right) M, \quad \text{for all } j \in J, s \in S, t = 0 \dots T_{js} \quad (\text{FBP1-R-8})$$

$$\eta_{js} = \sum_{t=0}^{T_{js}} t \kappa_{js}^t, \quad \text{for all } j \in J, s \in S, \quad (\text{FBP1-R-9})$$

$$\sum_{t=0}^{T_{js}} \kappa_{js}^t = 1, \quad \text{for all } j \in J, s \in S, \quad (\text{FBP1-R-10})$$

$$SC, \quad (\text{FBP1-R-11})$$

$$\eta_{js} \in \mathbb{Z}_+, \quad \text{for all } j \in J, s \in S, \quad (\text{FBP1-R-12})$$

$$\pi_{ijs} \geq 0, \quad \text{for all } i \in \hat{I}_s, j \in J, s \in S, \quad (\text{FBP1-R-13})$$

$$\lambda_{js} \geq 0, \quad \text{for all } j \in J, s \in S, \quad (\text{FBP1-R-14})$$

$$x_{ij} \in \{0, 1\}, \quad \text{for all } i \in I, j \in J, \quad (\text{FBP1-R-15})$$

$$\kappa_{js}^t \in \{0, 1\}, \quad \text{for all } j \in J, s \in S, t = 0 \dots T_{js}. \quad (\text{FBP1-R-16})$$

Appendix C

Table 1: Hub 1 detailed results

|                             | Workcenter 1 (#of Doors=12) |                 |                       |                       | Workcenter 2 (#of Doors=12) |                 |                       |                       | Workcenter 3 (#of Doors=12) |                 |                       |                       | Workcenter 4 (#of Doors=12) |                 |                       |                       |
|-----------------------------|-----------------------------|-----------------|-----------------------|-----------------------|-----------------------------|-----------------|-----------------------|-----------------------|-----------------------------|-----------------|-----------------------|-----------------------|-----------------------------|-----------------|-----------------------|-----------------------|
|                             | Imbalance                   | Nominal # Doors | Max. # Doors          | P{Exceeding Capacity} | Imbalance                   | Nominal # Doors | Max. # Doors          | P{Exceeding Capacity} | Imbalance                   | Nominal # Doors | Max. # Doors          | P{Exceeding Capacity} | Imbalance                   | Nominal # Doors | Max. # Doors          | P{Exceeding Capacity} |
| Sort 1                      | 6.12%                       | 7               | 8                     | —                     | 5.10%                       | 10              | 10                    | —                     | 4.86%                       | 10              | 12                    | —                     | 1.95%                       | 10              | 12                    | —                     |
| Sort 2                      | 4.30%                       | 8               | 11                    | —                     | 6.27%                       | 10              | 10                    | —                     | 4.82%                       | 11              | 12                    | —                     | 2.77%                       | 10              | 12                    | —                     |
| Sort 3                      | 4.34%                       | 8               | 10                    | —                     | 3.29%                       | 9               | 12                    | —                     | 3.90%                       | 7               | 9                     | —                     | 4.06%                       | 10              | 12                    | —                     |
| Sort 4                      | 3.44%                       | 5               | 8                     | —                     | 6.50%                       | 8               | 10                    | —                     | 6.42%                       | 6               | 11                    | —                     | 5.99%                       | 7               | 11                    | —                     |
| Workcenter 5 (#of Doors=12) |                             |                 |                       |                       |                             |                 |                       |                       |                             |                 |                       |                       |                             |                 |                       |                       |
| Imbalance                   | Nominal # Doors             | Max. # Doors    | P{Exceeding Capacity} | Imbalance             | Nominal # Doors             | Max. # Doors    | P{Exceeding Capacity} | Imbalance             | Nominal # Doors             | Max. # Doors    | P{Exceeding Capacity} | Imbalance             | Nominal # Doors             | Max. # Doors    | P{Exceeding Capacity} |                       |
| Sort 1                      | 2.68%                       | 9               | 11                    | —                     | 4.20%                       | 11              | 12                    | —                     | 1.54%                       | 10              | 11                    | —                     | 3.25%                       | 8               | 12                    | —                     |
| Sort 2                      | 2.64%                       | 9               | 12                    | —                     | 3.00%                       | 10              | 12                    | —                     | 2.27%                       | 10              | 12                    | —                     | 3.35%                       | 8               | 11                    | —                     |
| Sort 3                      | 5.30%                       | 7               | 10                    | —                     | 2.35%                       | 10              | 12                    | —                     | 3.07%                       | 10              | 11                    | —                     | 4.89%                       | 8               | 10                    | —                     |
| Sort 4                      | 5.14%                       | 6               | 7                     | —                     | 5.69%                       | 8               | 10                    | —                     | 4.58%                       | 7               | 8                     | —                     | 5.03%                       | 5               | 7                     | —                     |

Table 2: Hub 2 detailed results

|                             | Workcenter 1 (#of Doors=13) |                 |                       |                       | Workcenter 2 (#of Doors=18) |                 |                       |                       | Workcenter 3 (#of Doors=18) |                 |                       |                       |
|-----------------------------|-----------------------------|-----------------|-----------------------|-----------------------|-----------------------------|-----------------|-----------------------|-----------------------|-----------------------------|-----------------|-----------------------|-----------------------|
|                             | Imbalance                   | Nominal # Doors | Max. # Doors          | P{Exceeding Capacity} | Imbalance                   | Nominal # Doors | Max. # Doors          | P{Exceeding Capacity} | Imbalance                   | Nominal # Doors | Max. # Doors          | P{Exceeding Capacity} |
| Sort 1                      | 1.22%                       | 11              | 13                    | —                     | 2.69%                       | 15              | 18                    | —                     | 1.70%                       | 17              | 18                    | —                     |
| Sort 2                      | 1.72%                       | 10              | 12                    | —                     | 1.89%                       | 16              | 17                    | —                     | 1.45%                       | 16              | 18                    | —                     |
| Sort 3                      | 1.57%                       | 10              | 11                    | —                     | 2.44%                       | 16              | 17                    | —                     | 2.53%                       | 15              | 18                    | —                     |
| Sort 4                      | 2.86%                       | 10              | 11                    | —                     | 2.80%                       | 14              | 16                    | —                     | 2.85%                       | 14              | 16                    | —                     |
| Workcenter 4 (#of Doors=17) |                             |                 |                       |                       |                             |                 |                       |                       |                             |                 |                       |                       |
| Imbalance                   | Nominal # Doors             | Max. # Doors    | P{Exceeding Capacity} | Imbalance             | Nominal # Doors             | Max. # Doors    | P{Exceeding Capacity} | Imbalance             | Nominal # Doors             | Max. # Doors    | P{Exceeding Capacity} |                       |
| Sort 1                      | 2.77%                       | 14              | 18                    | 0.0004                | 1.26%                       | 13              | 17                    | 0.0075                | 2.50%                       | 16              | 17                    | —                     |
| Sort 2                      | 1.98%                       | 13              | 16                    | —                     | 2.69%                       | 13              | 15                    | —                     | 2.45%                       | 15              | 17                    | —                     |
| Sort 3                      | 2.00%                       | 14              | 15                    | —                     | 1.74%                       | 14              | 15                    | —                     | 2.14%                       | 14              | 17                    | —                     |
| Sort 4                      | 2.58%                       | 13              | 13                    | —                     | 2.75%                       | 12              | 13                    | —                     | 2.85%                       | 12              | 13                    | —                     |

**Table 3: Hub 3 detailed results**

|        |  | Workcenter 1 (#of Doors=22) |                 |              |                                  | Workcenter 2 (#of Doors=22) |                 |              |                                  |
|--------|--|-----------------------------|-----------------|--------------|----------------------------------|-----------------------------|-----------------|--------------|----------------------------------|
|        |  | Imbalance                   | Nominal # Doors | Max. # Doors | $P\{\text{Exceeding Capacity}\}$ | Imbalance                   | Nominal # Doors | Max. # Doors | $P\{\text{Exceeding Capacity}\}$ |
| Sort 1 |  | 3.31%                       | 20              | 24           | 0.0770                           | 3.70%                       | 20              | 24           | 0.0016                           |
| Sort 2 |  | 1.93%                       | 21              | 22           | —                                | 3.65%                       | 19              | 20           | —                                |
| Sort 3 |  | 2.50%                       | 21              | 22           | —                                | 2.08%                       | 17              | 19           | —                                |
| Sort 4 |  | 3.62%                       | 21              | 22           | —                                | 3.75%                       | 16              | 19           | —                                |
|        |  | Workcenter 3 (#of Doors=22) |                 |              |                                  | Workcenter 4 (#of Doors=22) |                 |              |                                  |
|        |  | Imbalance                   | Nominal # Doors | Max. # Doors | $P\{\text{Exceeding Capacity}\}$ | Imbalance                   | Nominal # Doors | Max. # Doors | $P\{\text{Exceeding Capacity}\}$ |
| Sort 1 |  | 3.55%                       | 19              | 24           | 0.0009                           | 3.68%                       | 18              | 25           | 0.0043                           |
| Sort 2 |  | 2.73%                       | 20              | 21           | —                                | 1.96%                       | 20              | 22           | —                                |
| Sort 3 |  | 3.22%                       | 19              | 21           | —                                | 1.82%                       | 20              | 22           | —                                |
| Sort 4 |  | 3.68%                       | 18              | 23           | 0.0000                           | 3.58%                       | 19              | 22           | —                                |

**Table 4: Hub 5 detailed results**

|        |  | Workcenter 1 (#of Doors=18) |                 |              |                                  | Workcenter 2 (#of Doors=14) |                 |              |                                  | Workcenter 3 (#of Doors=16) |                 |              |                                  |
|--------|--|-----------------------------|-----------------|--------------|----------------------------------|-----------------------------|-----------------|--------------|----------------------------------|-----------------------------|-----------------|--------------|----------------------------------|
|        |  | Imbalance                   | Nominal # Doors | Max. # Doors | $P\{\text{Exceeding Capacity}\}$ | Imbalance                   | Nominal # Doors | Max. # Doors | $P\{\text{Exceeding Capacity}\}$ | Imbalance                   | Nominal # Doors | Max. # Doors | $P\{\text{Exceeding Capacity}\}$ |
| Sort 1 |  | 7.91%                       | 10              | 13           | —                                | 7.91%                       | 8               | 9            | —                                | 4.01%                       | 14              | 14           | —                                |
| Sort 2 |  | 7.19%                       | 15              | 18           | —                                | 4.79%                       | 14              | 14           | —                                | 3.10%                       | 16              | 16           | —                                |
| Sort 3 |  | 7.86%                       | 11              | 13           | —                                | 7.81%                       | 9               | 11           | —                                | 8.53%                       | 14              | 14           | —                                |
| Sort 4 |  | 6.83%                       | 5               | 6            | —                                | 10.67%                      | 4               | 5            | —                                | 1.79%                       | 4               | 4            | —                                |
|        |  | Workcenter 4 (#of Doors=14) |                 |              |                                  | Workcenter 5 (#of Doors=16) |                 |              |                                  | Workcenter 6 (#of Doors=16) |                 |              |                                  |
|        |  | Imbalance                   | Nominal # Doors | Max. # Doors | $P\{\text{Exceeding Capacity}\}$ | Imbalance                   | Nominal # Doors | Max. # Doors | $P\{\text{Exceeding Capacity}\}$ | Imbalance                   | Nominal # Doors | Max. # Doors | $P\{\text{Exceeding Capacity}\}$ |
| Sort 1 |  | 2.75%                       | 9               | 10           | —                                | 11.86%                      | 12              | 12           | —                                | 2.24%                       | 9               | 12           | —                                |
| Sort 2 |  | 2.28%                       | 12              | 14           | —                                | 9.57%                       | 15              | 16           | —                                | 1.98%                       | 12              | 17           | 0.0098                           |
| Sort 3 |  | 4.65%                       | 9               | 9            | —                                | 12.07%                      | 15              | 16           | —                                | 6.58%                       | 10              | 10           | —                                |
| Sort 4 |  | 10.89%                      | 5               | 7            | —                                | 11.76%                      | 7               | 9            | —                                | 6.05%                       | 6               | 7            | —                                |
